# Supplementary material
Source: Springer Nature journal article supplement (https://www.springermedizin.de/resource/supplementary/13075_2010_2873_MOESM6_ESM.pdf/9693080)

## (a) Cathepsin

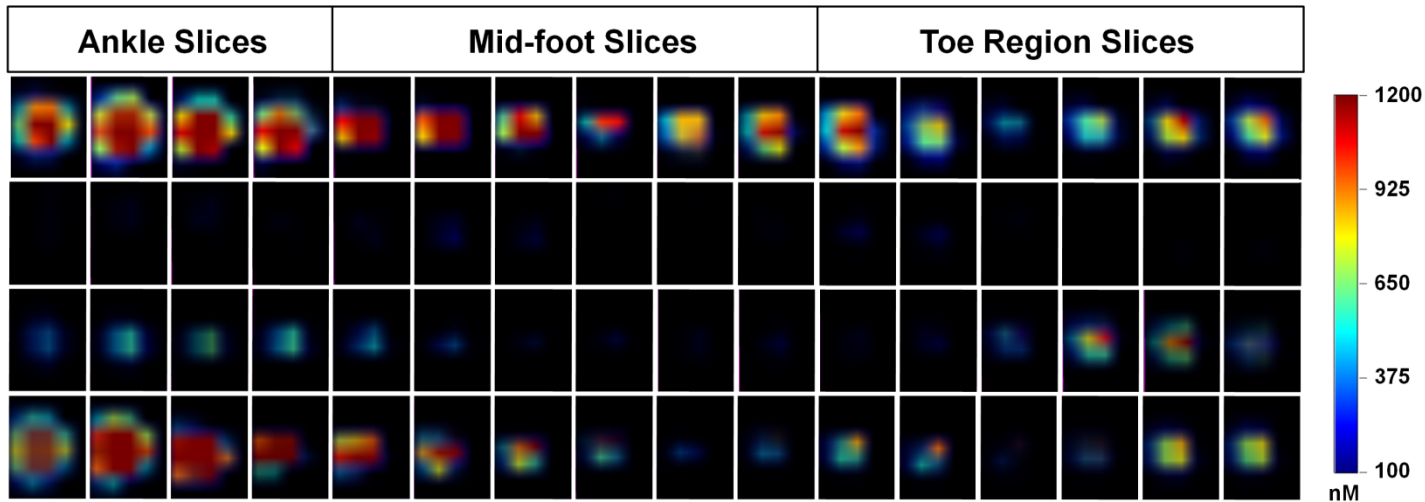

## (b) MMP

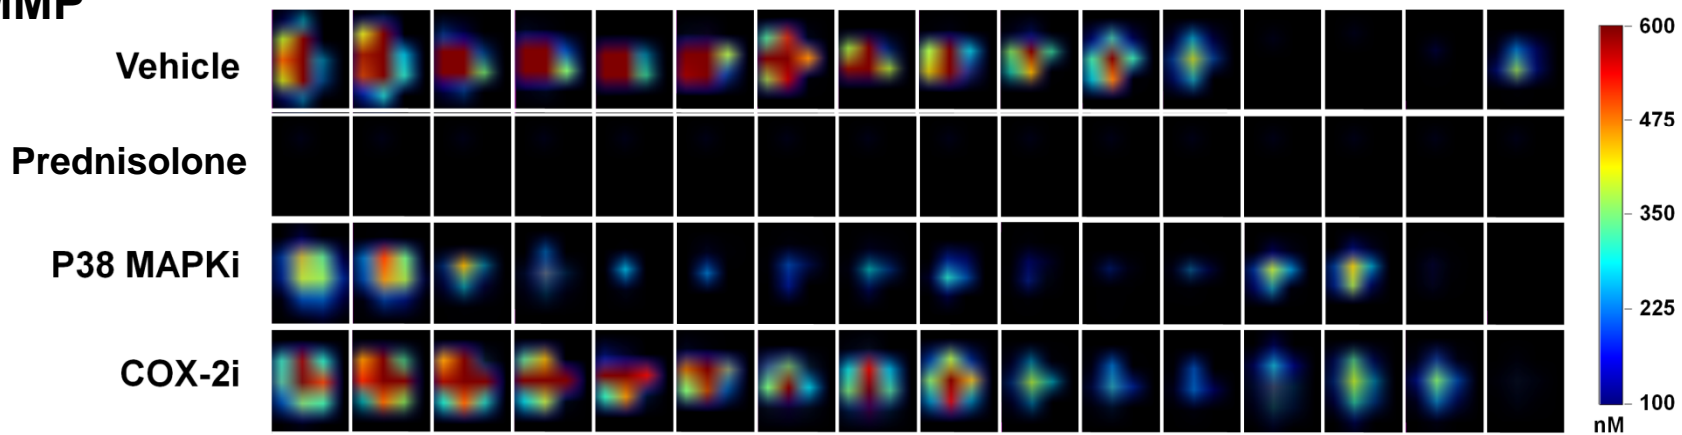

Supplement: MOESM6 [file 9693080]
